# Supplementary material
Source: HighWire-hosted journal article supplement (https://jnm.snmjournals.org/highwire/filestream/94862/field_highwire_adjunct_files/0/162289_Supplemental_Data.pdf)
Supplement: 162289_Supplemental_Data.pdf [file 162289_Supplemental_Data.pdf]

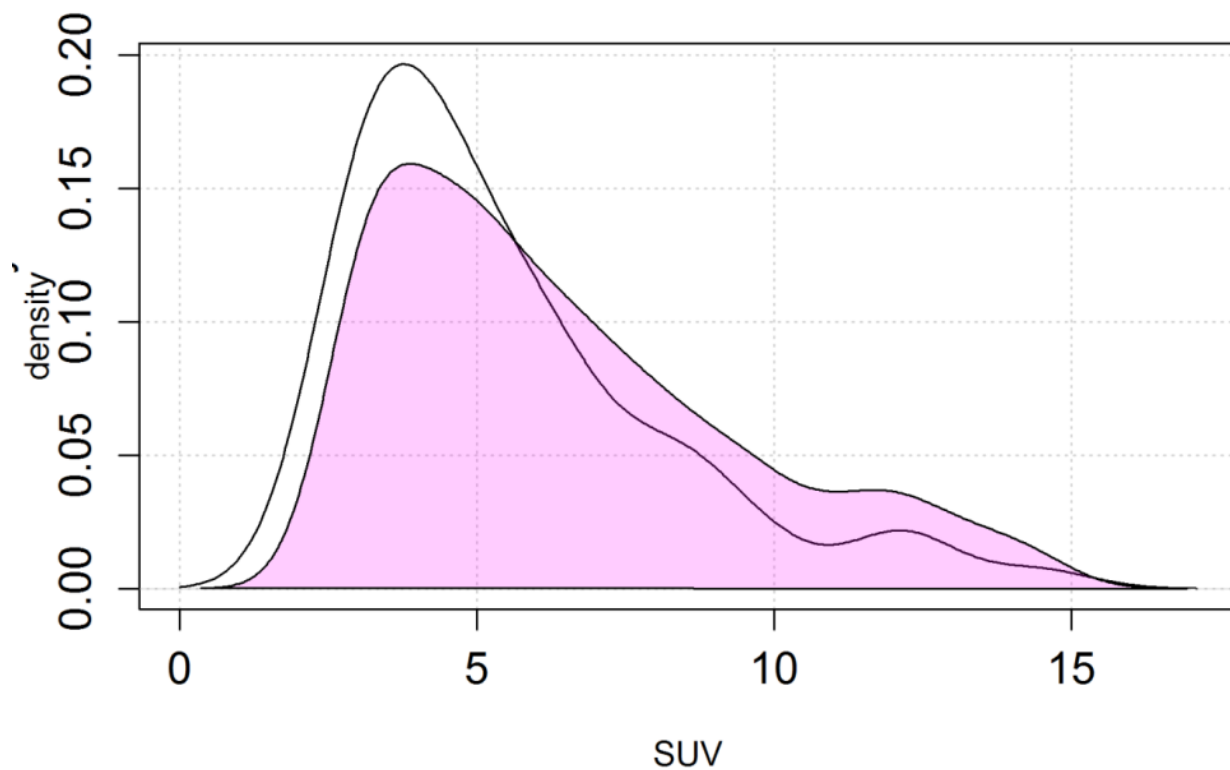

**Supplemental Figure 1:** Standardized uptake value (SUV) at 55-60 minutes after injection for 63 pretherapy scans in the locally advanced breast cancer (LABC) cohort (unshaded) and for 1,000 simulated scans (shaded). The simulation values have a somewhat higher average SUV (6.45 vs. 5.50), but the location of the peak and general shape are similar.

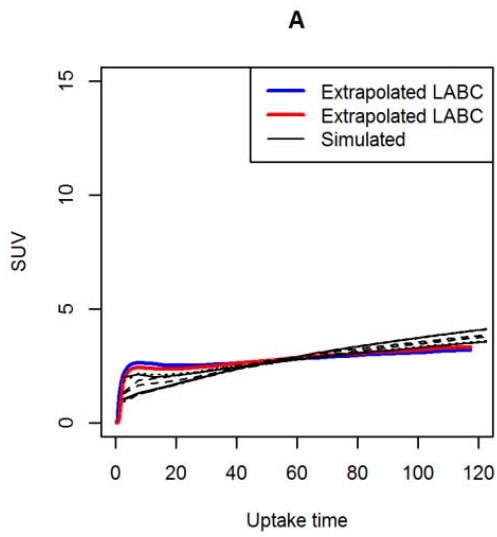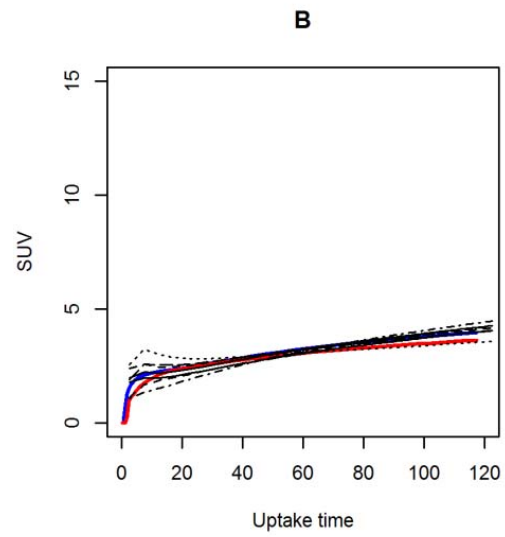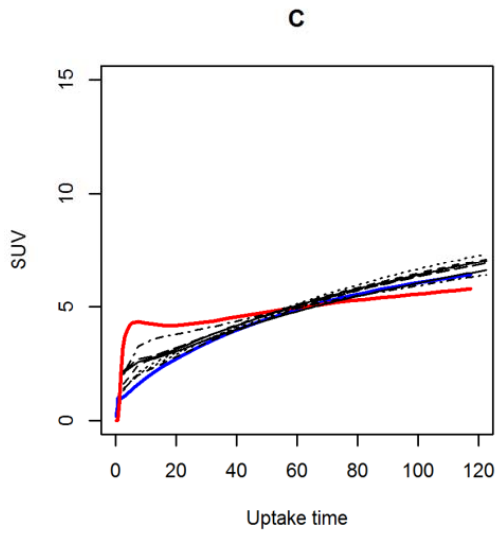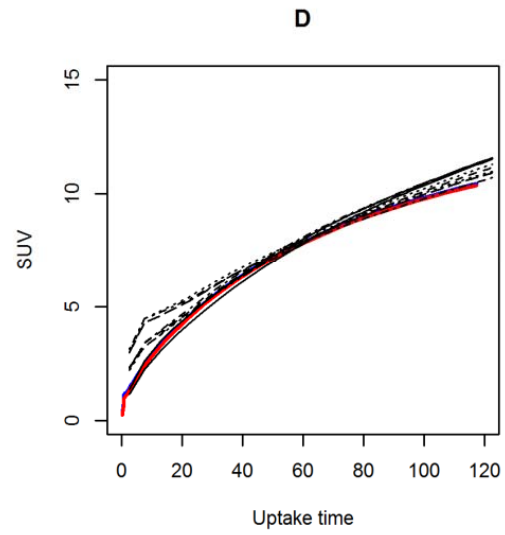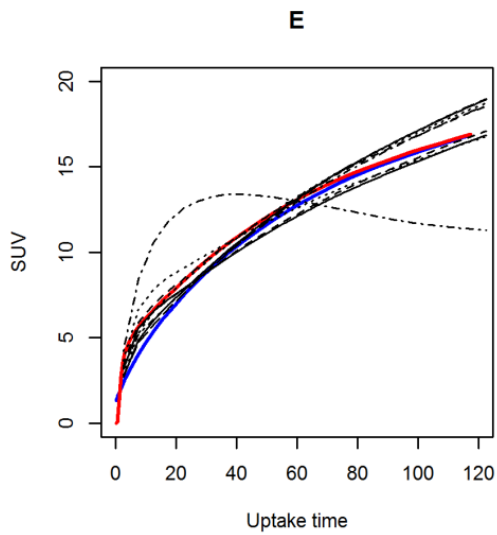

**Supplemental Figure 2:** Fitted time-activity curves from the locally advanced breast cancer (LABC) cohort (thick red and blue lines), with kinetic parameters from 60-minute dynamic scans and synthetic curve generation extrapolated to 120 minutes, and time-activity curves from study simulations (thin black lines). Panels are in order of increasing SUV, over the range of observed values. Within each panel, curves are selected to have similar SUV at 55-60 minutes. In panels A and D, the simulated SUVs increase with uptake time slightly more quickly than the SUVs from the selected LABC synthetic curves. In panel B, the blue curve and most simulated curves follow one trajectory, whereas the red curve and one of the simulated curves have SUV increasing more slowly with uptake time. In panels C and E, one curve has a different shape from the others. In panel C, the unusual curve is an LABC synthetic curve, and in panel E it is a simulated curve. Variation between simulated and synthetic curves in the relationship between uptake time and SUV does not appear to be greater than variation observed between different synthetic (LABC cohort) curves with similar SUV at 55-60 minutes.
